# Supplementary material for: Low-temperature growth of spinel-type Li1+xMn2−xO4crystals using a LiCl–KCl flux and their performance as a positive active material in lithium-ion rechargeable batteries
Source: Royal Society of Chemistry journal article supplement (doi:10.1039/c3ce41682h), 2013-11-11
Supplement: c3ce41682h.pdf [file c3ce41682h.pdf]

## Electronic Supplementary Information (ESI) data

| run | holding temperature / °C | solute                              |                       | flux     |         | solute concentration (mol%) |
|-----|--------------------------|-------------------------------------|-----------------------|----------|---------|-----------------------------|
|     |                          | Li <sub>2</sub> CO <sub>3</sub> / g | MnCO <sub>3</sub> / g | LiCl / g | KCl / g |                             |
| 1   | 900                      | 0.544                               | 3.383                 | 6.785    | 3.999   | 10                          |
| 2   | 900                      | 1.191                               | 7.413                 | 1.898    | 2.272   | 30                          |
| 3   | 900                      | 1.564                               | 9.732                 | 1.068    | 1.278   | 50                          |
| 4   | 900                      | 1.806                               | 11.238                | 0.528    | 0.632   | 70                          |
| 5   | 900                      | 1.564                               | 9.732                 | -        | -       | (100)                       |
| 6   | 1100                     | 1.564                               | 9.732                 | 1.068    | 1.278   | 50                          |
| 7   | 600                      | 1.564                               | 9.732                 | 1.068    | 1.278   | 50                          |
| 8   | 500                      | 1.564                               | 9.732                 | 1.068    | 1.278   | 50                          |

Supplementary Information 1

Growth conditions for obtaining Li<sub>1+x</sub>Mn<sub>2-x</sub>O<sub>4</sub> crystals.

## Electronic Supplementary Information (ESI) data

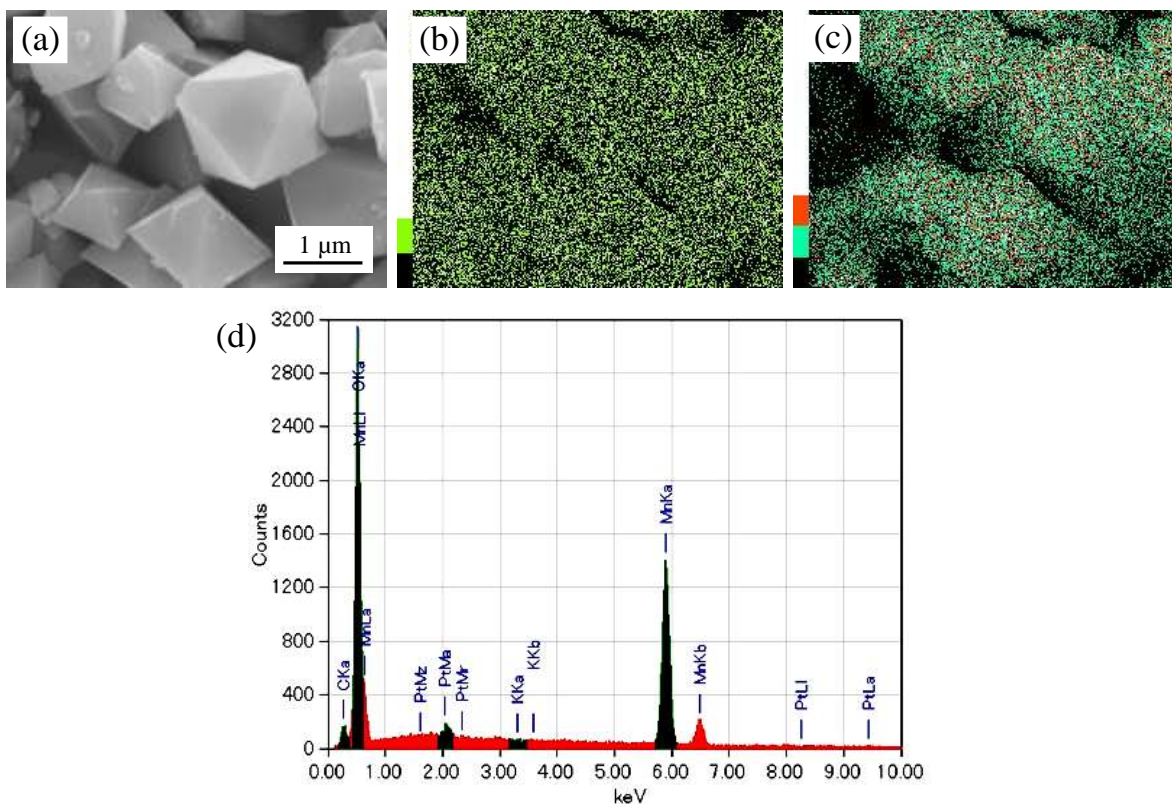

Supplementary Information 2

EDS analyses of  $\text{Li}_{1+x}\text{Mn}_{2-x}\text{O}_4$  crystals provided as (a) a gray image, (b) a Mn mapping image, (c) an O mapping image, and (d) the corresponding spectra.

## Electronic Supplementary Information (ESI) data

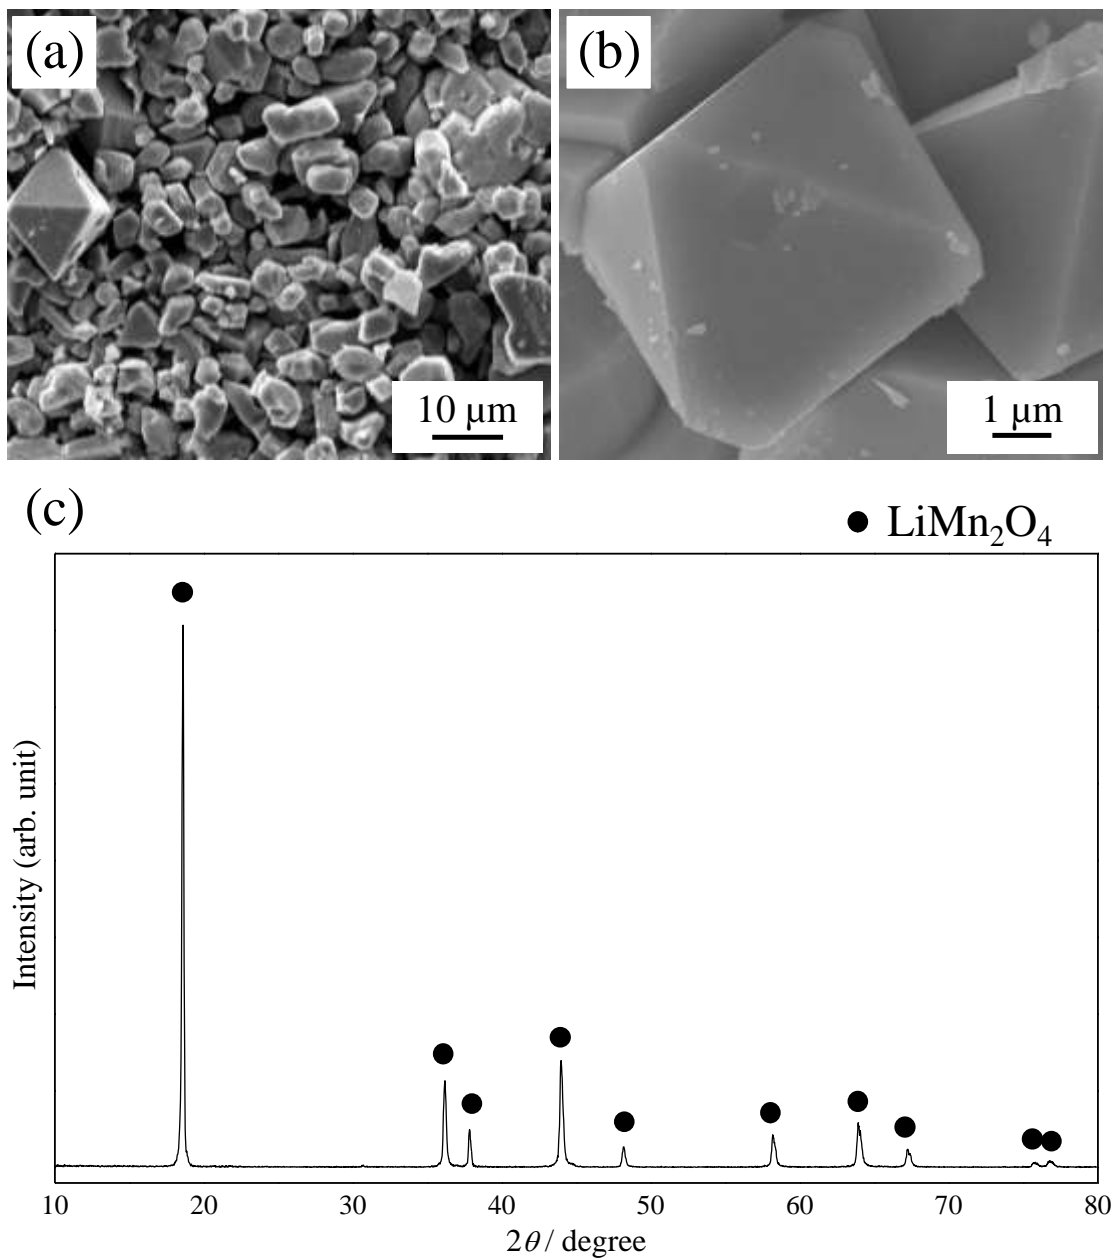

Supplementary Information 3

(a, b) SEM images and (c) XRD profiles of  $\text{LiMn}_2\text{O}_4$  crystals grown at 50 mol% and 1100  $^\circ\text{C}$ .

## Electronic Supplementary Information (ESI) data

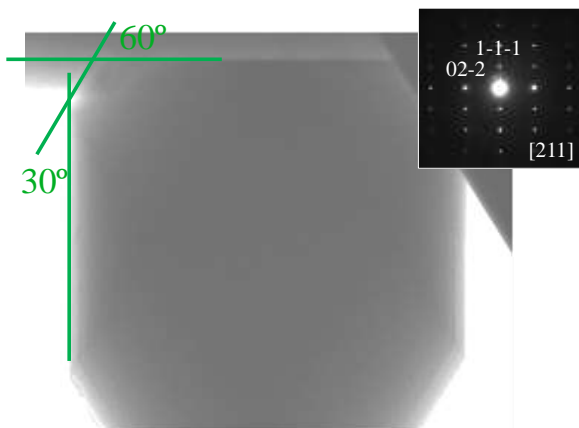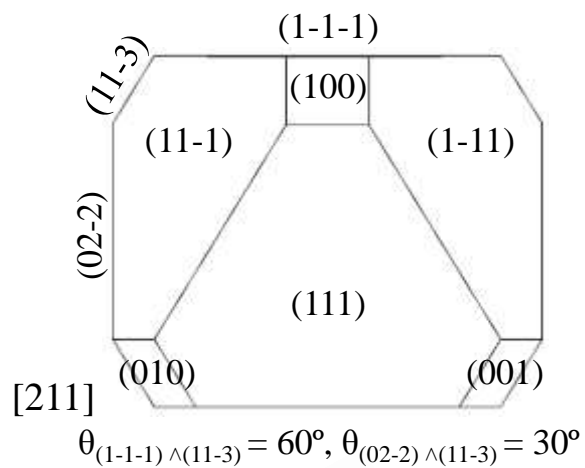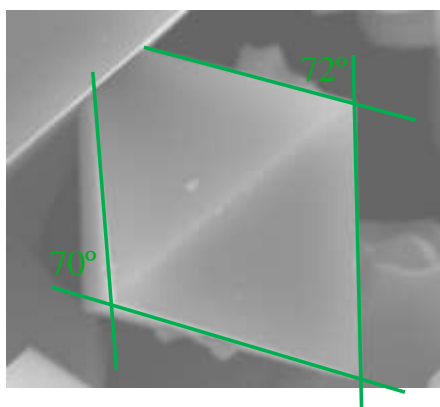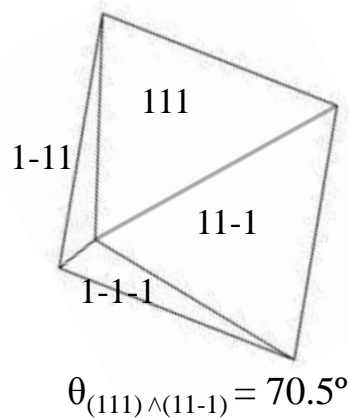

Supplementary Information 4

Crystal shape of the typical flux-grown  $\text{Li}_{1+x}\text{Mn}_{2-x}\text{O}_4$  crystal.
